# Supplementary material
Source: PubMed Central journal article supplement (PMC10176184)
Supplement: jamaotolaryngolheadnecksurg-e230841-s001.pdf [file jamaotolaryngolheadnecksurg-e230841-s001.pdf]

## Supplemental Online Content

Goutaki M, Lam YT, Alexandru M, et al. Characteristics of otologic disease among patients with primary ciliary dyskinesia. *JAMA Otolaryngol Head Neck Surg*. Published online May 11, 2023. doi:10.1001/jamaoto.2023.0841

**eFigure 1.** Flowchart of patients with PCD who were invited and participated in EPIC-PCD and the study

**eTable 1.** Centre and diagnostic information of EPIC-PCD participants, overall and by age group (N=397)

**eTable 2.** Genetic mutations reported in EPIC-PCD participants with biallelic pathogenic variants or compound heterozygosity (N=192)

**eTable 3.** Frequency of self- and parent-reported ear symptoms of EPIC-PCD participants, overall and by age group (N=397)

**eFigure 2.** Venn diagram showing overlap of self- and parent-reported symptoms of EPIC-PCD participants (N=397)

**eTable 4.** Frequency of self- and parent-reported ear symptoms of EPIC-PCD participants with definite PCD diagnosis, overall and by age group (N=262)

**eTable 5.** Otoscopy findings of EPIC-PCD participants with definite diagnosis, overall and by age group (N=255)

**eTable 6.** Tympanometry findings of EPIC-PCD participants, overall and by age group (N=216)

**eFigure 3.** Factors associated with the A) ear inflammation and B) hearing score among EPIC-PCD participants with definite PCD diagnosis

**eFigure 4.** Association of ciliary ultrastructural defect with the A) ear inflammation and B) hearing score among EPIC-PCD participants

This supplemental material has been provided by the authors to give readers additional information about their work.

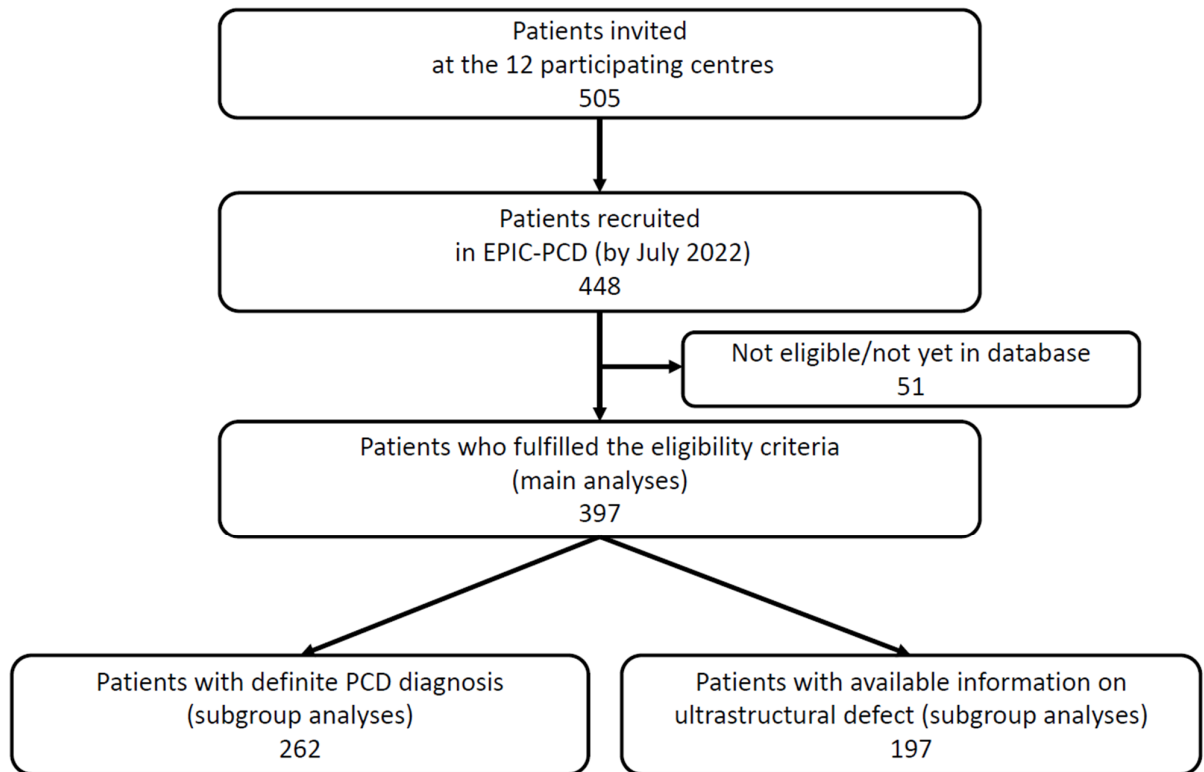

**eFigure 1.** Flowchart of patients with PCD who were invited and participated in EPIC-PCD and the study

EPIC-PCD: Ear-nose throat prospective international cohort of patients with primary ciliary dyskinesia

**eTable 1.** Centre and diagnostic information of EPIC-PCD participants, overall and by age group (N=397)

|                                                           | Total<br>N (%)   | Age 0-6 y<br>N (%) | Age 7-14 y<br>N (%) | Age 15-30 y<br>N (%) | Age 31-50y<br>N (%) | Age >50 y<br>N (%) |
|-----------------------------------------------------------|------------------|--------------------|---------------------|----------------------|---------------------|--------------------|
| <b>Number of participants</b>                             | <b>397 (100)</b> | <b>44 (100)</b>    | <b>130 (100)</b>    | <b>157 (100)</b>     | <b>43 (100)</b>     | <b>23 (100)</b>    |
| <b>Centre</b>                                             |                  |                    |                     |                      |                     |                    |
| Amsterdam                                                 | 26 (7)           | 3 (7)              | 12 (9)              | 11 (7)               | 0 (0)               | 0 (0)              |
| Ankara                                                    | 60 (15)          | 5 (11)             | 23 (18)             | 32 (20)              | 0 (0)               | 0 (0)              |
| Berlin                                                    | 43 (11)          | 8 (18)             | 4 (3)               | 16 (10)              | 10 (23)             | 5 (22)             |
| Bern                                                      | 7 (2)            | 1 (2)              | 2 (2)               | 4(3)                 | 0 (0)               | 0 (0)              |
| Cyprus                                                    | 22 (6)           | 3 (7)              | 3 (2)               | 6 (4)                | 6 (14)              | 4 (17)             |
| Istanbul                                                  | 66 (17)          | 4 (9)              | 26 (20)             | 34 (22)              | 2 (5)               | 0 (0)              |
| Leuven                                                    | 12 (3)           | 0 (0)              | 5 (4)               | 6 (4)                | 1 (2)               | 0 (0)              |
| Liege                                                     | 10 (2)           | 1 (2)              | 4 (3)               | 3 (2)                | 2 (5)               | 0 (0)              |
| Oslo                                                      | 39 (9)           | 3 (7)              | 22 (17)             | 14 (9)               | 0 (0)               | 0 (0)              |
| Paris                                                     | 53 (13)          | 0 (0)              | 7 (5)               | 17 (11)              | 20 (47)             | 9 (39)             |
| Southampton                                               | 43 (11)          | 14 (32)            | 22 (17)             | 7 (4)                | 0 (0)               | 0 (0)              |
| Valencia                                                  | 16 (4)           | 2 (5)              | 0 (0)               | 7 (4)                | 2 (5)               | 5 (22)             |
| <b>Nasal nitric oxide measurement</b>                     |                  |                    |                     |                      |                     |                    |
| Indicative for PCD                                        | 249 (63)         | 22 (50)            | 76 (59)             | 103 (65)             | 32 (74)             | 16 (70)            |
| Not indicative for PCD                                    | 16 (4)           | 1 (2)              | 3 (2)               | 9 (6)                | 3 (7)               | 0 (0)              |
| Not performed/pending                                     | 132 (33)         | 21 (48)            | 51 (39)             | 45 (29)              | 8 (19)              | 7 (30)             |
| <b>Transmission Electron Microscopy</b>                   |                  |                    |                     |                      |                     |                    |
| Hallmark defect                                           | 135 (34)         | 13 (30)            | 42 (32)             | 53 (34)              | 17 (40)             | 10 (43)            |
| Other defect                                              | 21 (5)           | 0 (0)              | 9 (7)               | 7 (4)                | 3 (7)               | 2 (9)              |
| Normal ultrastructure                                     | 41 (10)          | 9 (20)             | 15 (12)             | 9 (6)                | 5 (11)              | 3 (13)             |
| Not performed/pending                                     | 200 (51)         | 22 (50)            | 64 (49)             | 88 (56)              | 18 (42)             | 8 (35)             |
| <b>High-speed videomicroscopy analysis</b>                |                  |                    |                     |                      |                     |                    |
| Indicative for PCD                                        | 207 (52)         | 30 (68)            | 62 (48)             | 79 (51)              | 19 (44)             | 17 (74)            |
| Other/unclear                                             | 13 (3)           | 4 (9)              | 6 (5)               | 2 (1)                | 1 (2)               | 0 (0)              |
| Normal motility                                           | 6 (2)            | 1 (2)              | 2 (2)               | 2 (1)                | 1 (2)               | 0 (0)              |
| Not performed/pending                                     | 170 (43)         | 9 (21)             | 59 (45)             | 74 (47)              | 22 (52)             | 6 (26)             |
| <b>Genetic testing</b>                                    |                  |                    |                     |                      |                     |                    |
| No pathogenic variants                                    | 32 (8)           | 5 (11)             | 12 (9)              | 11 (7)               | 2 (5)               | 2 (9)              |
| Results pending                                           | 13 (3)           | 1 (2)              | 5 (4)               | 7 (4)                | 0 (0)               | 0 (0)              |
| Biallelic pathogenic variants/<br>compound heterozygosity | 192 (48)         | 21 (48)            | 61 (47)             | 70 (45)              | 28 (65)             | 12 (52)            |
| Heterozygous variant                                      | 43 (11)          | 3 (7)              | 7 (5)               | 25 (16)              | 4 (9)               | 4 (17)             |
| Not performed                                             | 117 (30)         | 14 (32)            | 45 (35)             | 44 (28)              | 9 (21)              | 5 (22)             |
| <b>Immunofluorescence</b>                                 |                  |                    |                     |                      |                     |                    |
| Indicative for PCD                                        | 36 (9)           | 7 (16)             | 6 (5)               | 21 (13)              | 2 (5)               | 0 (0)              |
| Not indicative for PCD                                    | 36 (9)           | 8 (18)             | 17 (13)             | 9 (6)                | 1 (2)               | 1 (4)              |
| Not performed/pending                                     | 325 (82)         | 29 (66)            | 107 (82)            | 127 (81)             | 40 (93)             | 22 (96)            |

EPIC-PCD: Ear-nose throat prospective international cohort of patients with primary ciliary dyskinesia. y: years. Characteristics are presented as N and column %.

**eTable 2.** Genetic mutations reported in EPIC-PCD participants with biallelic pathogenic variants or compound heterozygosity (N=192)

| <b>Genetic mutation</b> | <b>N (%)</b>     |
|-------------------------|------------------|
| DNAH5                   | 36 (19)          |
| DNAH11                  | 24 (12)          |
| CCDC40                  | 23 (12)          |
| HYDIN                   | 13 (7)           |
| CCDC39                  | 10 (5)           |
| RSPH4A                  | 9 (5)            |
| DNAI1                   | 9 (5)            |
| CCNO                    | 8 (4)            |
| RSPH9                   | 8 (4)            |
| DNAAF1                  | 6 (3)            |
| RSPH3                   | 5 (3)            |
| CCDC114                 | 5 (3)            |
| DNAH9                   | 4 (2)            |
| C11ORF70                | 4 (2)            |
| TTC25                   | 3 (2)            |
| DNAI2                   | 5 (3)            |
| DNAAF11                 | 3 (2)            |
| CCDC65                  | 2 (1)            |
| DNAFF2                  | 2 (1)            |
| CCDC103                 | 1 (0.5)          |
| ZMYND10                 | 1 (0.5)          |
| DRC1                    | 1 (0.5)          |
| DNAH1                   | 1 (0.5)          |
| DNAAF3                  | 1 (0.5)          |
| DNAAF5                  | 1 (0.5)          |
| ARMC4                   | 1 (0.5)          |
| CCDCC151                | 1 (0.5)          |
| DCLRE1C                 | 1 (0.5)          |
| FOXJ1                   | 1 (0.5)          |
| <b>Total</b>            | <b>192 (100)</b> |

EPIC-PCD: Ear-nose throat prospective international cohort of patients with primary ciliary dyskinesia.

**eTable 3.** Frequency of self- and parent-reported ear symptoms of EPIC-PCD participants, overall and by age group (N=397)

|                               | Total<br>N (%) | Age 0-6 y<br>N (%) | Age 7-14 y<br>N (%) | Age 15-30 y<br>N (%) | Age 31-50 y<br>N (%) | Age >50 y<br>N (%) | Cramér's V<br>(95%CI) <sup>a</sup> |
|-------------------------------|----------------|--------------------|---------------------|----------------------|----------------------|--------------------|------------------------------------|
| <b>Number of participants</b> | 397 (100)      | 44 (100)           | 130 (100)           | 157 (100)            | 43 (100)             | 23 (100)           |                                    |
| <b>Ear pain</b>               |                |                    |                     |                      |                      |                    |                                    |
| Daily                         | 14 (3)         | 0 (0)              | 2 (1)               | 6 (4)                | 4 (9)                | 2 (9)              | 0.17 (0.11-0.19)                   |
| Often                         | 36 (9)         | 2 (4)              | 10 (8)              | 16 (10)              | 3 (7)                | 5 (22)             |                                    |
| Sometimes                     | 70 (18)        | 6 (14)             | 25 (19)             | 21 (13)              | 9 (21)               | 9 (39)             |                                    |
| Rarely                        | 84 (21)        | 6 (14)             | 22 (17)             | 37 (24)              | 16 (37)              | 3 (13)             |                                    |
| Never/not reported            | 193 (49)       | 30 (68)            | 71 (55)             | 77 (49)              | 11 (26)              | 4 (17)             |                                    |
| <b>Ear discharge</b>          |                |                    |                     |                      |                      |                    |                                    |
| Daily                         | 7 (2)          | 1 (2)              | 3 (2)               | 1 (1)                | 1 (2)                | 1 (4)              | 0.12 (0.08-0.13)                   |
| Often                         | 15 (4)         | 0 (0)              | 2 (2)               | 7 (4)                | 3 (7)                | 3 (13)             |                                    |
| Sometimes                     | 40 (10)        | 2 (5)              | 21 (16)             | 13 (8)               | 3 (7)                | 1 (4)              |                                    |
| Rarely                        | 48 (12)        | 4 (9)              | 12 (9)              | 22 (14)              | 6 (14)               | 4 (17)             |                                    |
| Never/not reported            | 287 (72)       | 37 (84)            | 92 (71)             | 114 (73)             | 30 (70)              | 14 (61)            |                                    |
| <b>Hearing problems</b>       |                |                    |                     |                      |                      |                    |                                    |
| Daily                         | 37 (9)         | 2 (5)              | 10 (8)              | 9 (6)                | 7 (16)               | 9 (39)             | 0.21 (0.13-0.24)                   |
| Often                         | 38 (10)        | 4 (9)              | 10 (8)              | 10 (6)               | 8 (18)               | 6 (26)             |                                    |
| Sometimes                     | 61 (15)        | 5 (11)             | 25 (19)             | 17 (11)              | 9 (21)               | 5 (22)             |                                    |
| Rarely                        | 47 (12)        | 1 (2)              | 14 (10)             | 26 (16)              | 5 (12)               | 1 (4)              |                                    |
| Never/not reported            | 214 (54)       | 32 (73)            | 71 (55)             | 95 (61)              | 14 (33)              | 2 (9)              |                                    |

EPIC-PCD: Ear-nose throat prospective international cohort of patients with primary ciliary dyskinesia. y: years.

Symptoms are presented as N and column %.

a: Cramér's V and bias-corrected 95% confidence intervals based on chi-squared test of independence; it ranges from 0 (no association) to 1 (strong association).

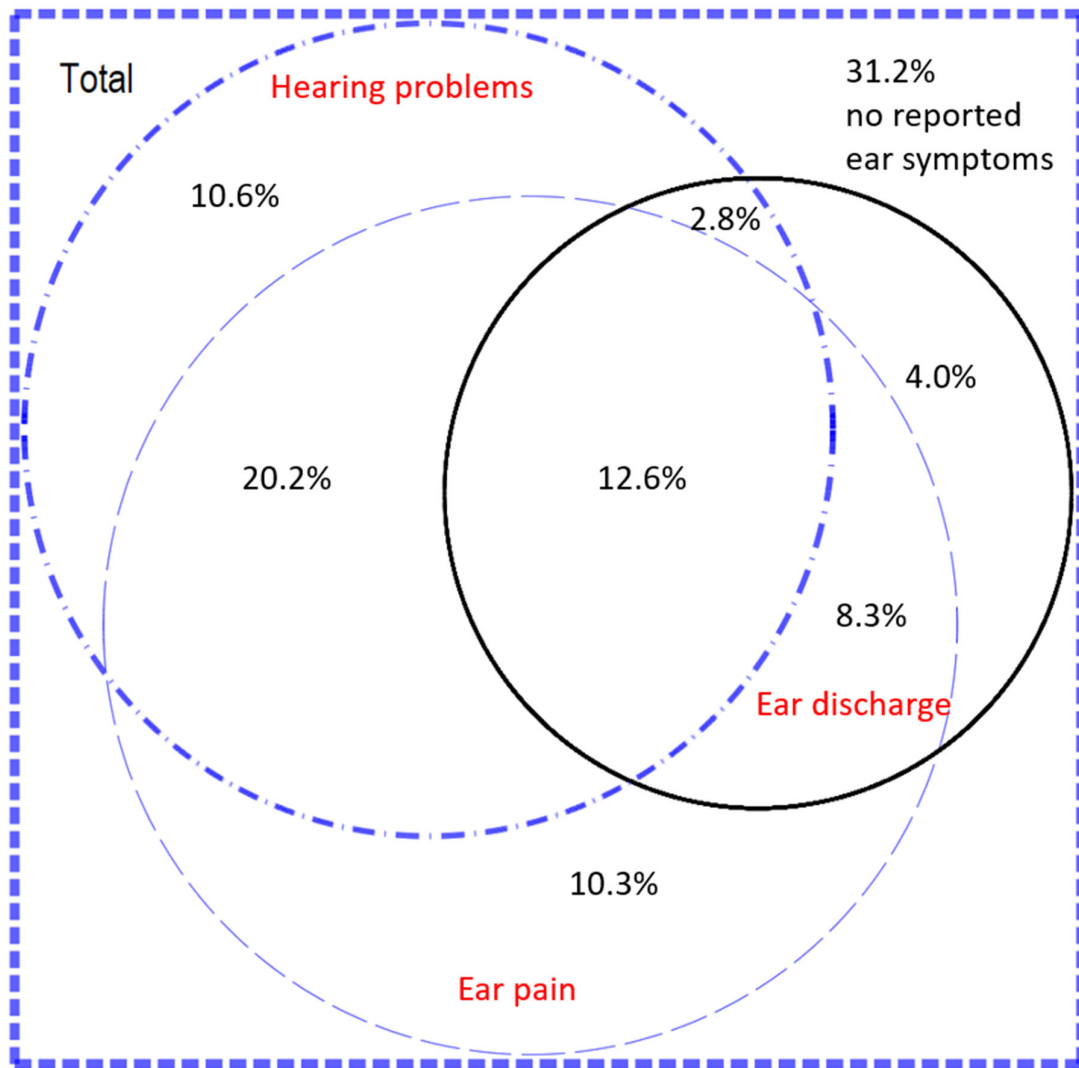

**eFigure 2.** Venn diagram showing overlap of self- and parent-reported symptoms of EPIC-PCD participants (N=397)

EPIC-PCD: Ear-nose throat prospective international cohort of patients with primary ciliary dyskinesia

**eTable 4.** Frequency of self- and parent-reported ear symptoms of EPIC-PCD participants with definite PCD diagnosis, overall and by age group (N=262)

|                               | Total<br>N (%) | Age 0-6 y<br>N (%) | Age 7-14 y<br>N (%) | Age 15-30 y<br>N (%) | Age 31-50 y<br>N (%) | Age >50 y<br>N (%) | Cramér's V<br>(95%CI) <sup>a</sup> |
|-------------------------------|----------------|--------------------|---------------------|----------------------|----------------------|--------------------|------------------------------------|
| <b>Number of participants</b> | 262 (100)      | 29 (100)           | 81 (100)            | 102 (100)            | 35 (100)             | 15 (100)           |                                    |
| <b>Ear pain</b>               |                |                    |                     |                      |                      |                    |                                    |
| Daily                         | 10 (4)         | 0 (0)              | 1 (1)               | 4 (4)                | 4 (11)               | 1 (7)              | 0.19 (0.12-0.21)                   |
| Often                         | 18 (7)         | 0 (0)              | 5 (6)               | 8 (8)                | 2 (6)                | 3 (20)             |                                    |
| Sometimes                     | 45 (17)        | 4 (14)             | 15 (19)             | 11 (11)              | 9 (26)               | 6 (40)             |                                    |
| Rarely                        | 57 (22)        | 4 (14)             | 14 (17)             | 27 (26)              | 10 (28.5)            | 2 (13)             |                                    |
| Never/not reported            | 132 (50)       | 21 (72)            | 46 (57)             | 52 (51)              | 10 (28.5)            | 3 (20)             |                                    |
| <b>Ear discharge</b>          |                |                    |                     |                      |                      |                    |                                    |
| Daily                         | 5 (2)          | 0 (0)              | 2 (2)               | 1 (1)                | 1 (3)                | 1 (7)              | 0.14 (0.09-0.15)                   |
| Often                         | 8 (3)          | 0 (0)              | 1 (1)               | 3 (3)                | 2 (6)                | 2 (13)             |                                    |
| Sometimes                     | 26 (10)        | 2 (7)              | 13 (16)             | 8 (8)                | 3 (9)                | 0 (0)              |                                    |
| Rarely                        | 33 (13)        | 2 (7)              | 7 (9)               | 16 (16)              | 5 (14)               | 3 (20)             |                                    |
| Never/not reported            | 190 (72)       | 25 (86)            | 58 (72)             | 74 (72)              | 24 (68)              | 9 (60)             |                                    |
| <b>Hearing problems</b>       |                |                    |                     |                      |                      |                    |                                    |
| Daily                         | 27 (10)        | 2 (7)              | 7 (9)               | 7 (7)                | 7 (20)               | 4 (27)             | 0.22 (0.14-0.25)                   |
| Often                         | 25 (10)        | 2 (7)              | 6 (8)               | 5 (5)                | 7 (20)               | 5 (33)             |                                    |
| Sometimes                     | 44 (17)        | 3 (10)             | 18 (22)             | 11 (11)              | 9 (26)               | 3 (20)             |                                    |
| Rarely                        | 31 (12)        | 0 (0)              | 10 (12)             | 17 (16)              | 3 (8)                | 1 (7)              |                                    |
| Never/not reported            | 135 (51)       | 22 (76)            | 40 (49)             | 62 (61)              | 9 (26)               | 2 (13)             |                                    |

EPIC-PCD: Ear-nose throat prospective international cohort of patients with primary ciliary dyskinesia. y: years.

Symptoms are presented as N and column %.

a: Cramér's V and bias-corrected 95% confidence intervals based on chi-squared test of independence; it ranges from 0 (no association) to 1 (strong association).

**eTable 5.** Otoscopy findings of EPIC-PCD participants with definite diagnosis, overall and by age group (N=255)

|                                   | Total<br>N (%) | Age 0-6 y<br>N (%) | Age 7-14 y<br>N (%) | Age 15-30 y<br>N (%) | Age 31-50 y<br>N (%) | Age >50 y<br>N (%) | Cramér's V<br>(95%CI) <sup>a</sup> |
|-----------------------------------|----------------|--------------------|---------------------|----------------------|----------------------|--------------------|------------------------------------|
| <b>Number of participants</b>     | 255 (100)      | 28 (100)           | 78 (100)            | 102 (100)            | 34 (100)             | 13 (100)           |                                    |
| <b>Acute otitis media</b>         |                |                    |                     |                      |                      |                    |                                    |
| Bilateral                         | 1 (0)          | 0 (0)              | 1 (1)               | 0 (0)                | 0 (0)                | 0 (0)              | 0.09 (0.02-0.10)                   |
| Unilateral                        | 1 (0)          | 0 (0)              | 0 (0)               | 1 (1)                | 0 (0)                | 0 (0)              |                                    |
| No                                | 243 (96)       | 26 (93)            | 75 (96)             | 96 (94)              | 33 (97)              | 13 (100)           |                                    |
| Not assessed                      | 10 (4)         | 2 (7)              | 2 (3)               | 5 (5)                | 1 (3)                | 0 (0)              |                                    |
| <b>Ear discharge</b>              |                |                    |                     |                      |                      |                    |                                    |
| Bilateral                         | 10 (4)         | 1 (4)              | 4 (5)               | 4 (4)                | 0 (0)                | 1 (8)              | 0.10 (0.08-0.10)                   |
| Unilateral                        | 15 (6)         | 0 (0)              | 7 (9)               | 6 (6)                | 1 (3)                | 1 (8)              |                                    |
| No                                | 228 (89)       | 27 (96)            | 67 (86)             | 91 (89)              | 32 (94)              | 11 (84)            |                                    |
| Not assessed                      | 2 (1)          | 0 (0)              | 0 (0)               | 1 (1)                | 1 (3)                | 0 (0)              |                                    |
| <b>Tympanic perforation</b>       |                |                    |                     |                      |                      |                    |                                    |
| Bilateral                         | 5 (2)          | 0 (0)              | 2 (3)               | 2 (2)                | 0 (0)                | 1 (8)              | 0.13 (0.08-0.16)                   |
| Unilateral                        | 12 (5)         | 0 (0)              | 7 (9)               | 6 (6)                | 2 (6)                | 0 (0)              |                                    |
| No                                | 228 (90)       | 25 (89)            | 68 (87)             | 91 (89)              | 32 (94)              | 12 (92)            |                                    |
| Not assessed                      | 7 (3)          | 3 (11)             | 1 (1)               | 3 (3)                | 0 (0)                | 0 (0)              |                                    |
| <b>Retracted membrane</b>         |                |                    |                     |                      |                      |                    |                                    |
| Bilateral                         | 18 (7)         | 0 (0)              | 5 (6.5)             | 9 (9)                | 1 (3)                | 3 (23)             | 0.19 (0.11-0.23)                   |
| Unilateral                        | 14 (6)         | 1 (3)              | 5 (6.5)             | 5 (5)                | 1 (3)                | 2 (15)             |                                    |
| No                                | 212 (83)       | 22 (79)            | 67 (86)             | 84 (82)              | 32 (94)              | 7 (54)             |                                    |
| Not assessed                      | 11 (4)         | 5 (18)             | 1 (1)               | 4 (4)                | 0 (0)                | 1 (8)              |                                    |
| <b>Otitis media with effusion</b> |                |                    |                     |                      |                      |                    |                                    |
| Bilateral                         | 61 (23)        | 9 (32.5)           | 25 (31)             | 19 (17)              | 4 (12)               | 4 (31)             | 0.15 (0.09-0.16)                   |
| Unilateral                        | 20 (8)         | 1 (5)              | 9 (10)              | 10 (10)              | 0 (0)                | 0 (0)              |                                    |
| No                                | 160 (64)       | 15 (55)            | 39 (52)             | 69 (70)              | 29 (85)              | 8 (61)             |                                    |
| Not assessed                      | 14 (5)         | 3 (7.5)            | 5 (7)               | 4 (3)                | 1 (3)                | 1 (8)              |                                    |
| <b>Tympanic sclerosis</b>         |                |                    |                     |                      |                      |                    |                                    |
| Bilateral                         | 35 (14)        | 0 (0)              | 7 (9)               | 12 (12)              | 12 (35)              | 4 (31)             | 0.18 (0.12-0.22)                   |
| Unilateral                        | 12 (5)         | 0 (0)              | 5 (6)               | 6 (6)                | 1 (3)                | 0 (0)              |                                    |
| No                                | 186 (73)       | 22 (79)            | 60 (77)             | 75 (74)              | 20 (59)              | 9 (69)             |                                    |
| Not assessed                      | 22 (8)         | 6 (21)             | 6 (8)               | 9 (9)                | 1 (3)                | 0 (0)              |                                    |
| <b>Tympanostomy tubes</b>         |                |                    |                     |                      |                      |                    |                                    |
| Bilateral                         | 8 (3)          | 0 (0)              | 4 (5)               | 4 (4)                | 0 (0)                | 0 (0)              | 0.11 (0.04-0.15)                   |
| Unilateral                        | 19 (7)         | 1 (4)              | 4 (5)               | 7 (7)                | 3 (9)                | 1 (8)              |                                    |
| No                                | 226 (88)       | 25 (89)            | 69 (89)             | 87 (89)              | 31 (91)              | 12 (92)            |                                    |
| Not assessed                      | 5 (2)          | 2 (7)              | 1 (1)               | 2 (2)                | 0 (0)                | 0 (0)              |                                    |
| <b>Hearing aids</b>               | 20 (8)         | 1 (4)              | 11 (14)             | 4 (4)                | 2 (6)                | 2 (15)             | 0.16 (0.07-0.22)                   |

EPIC-PCD: Ear-nose throat prospective international cohort of patients with primary ciliary dyskinesia.  
y: years. Findings are presented as N and column %.

a: Cramér's V and bias-corrected 95% confidence intervals based on chi-squared test of independence; it ranges from 0 (no association) to 1 (strong association).



**eTable 6.** Tympanometry findings of EPIC-PCD participants, overall and by age group (N=216)

|                               | Total<br>N (%) | Age 0-6 y<br>N (%) | Age 7-14 y<br>N (%) | Age 15-30 y<br>N (%) | Age 31-50 y<br>N (%) | Age >50 y<br>N (%) | Affected ears<br>(N=432)<br>N (%) |
|-------------------------------|----------------|--------------------|---------------------|----------------------|----------------------|--------------------|-----------------------------------|
| <b>Number of participants</b> | 216 (100)      | 14 (100)           | 70 (100)            | 92 (100)             | 26 (100)             | 14 (100)           |                                   |
| <b>Tympanogram type</b>       |                |                    |                     |                      |                      |                    |                                   |
| Type A                        |                |                    |                     |                      |                      |                    |                                   |
| Bilateral                     | 72 (32)        | 3 (21)             | 19 (27)             | 43 (47)              | 9 (34)               | 0 (0)              | 180 (41)                          |
| Unilateral                    | 36 (16)        | 2 (14)             | 9 (13)              | 16 (25)              | 7 (27)               | 4 (29)             |                                   |
| Type B                        |                |                    |                     |                      |                      |                    |                                   |
| Bilateral                     | 91 (42)        | 6 (43)             | 38 (54)             | 28 (30)              | 11 (42)              | 8 (57)             | 205 (47)                          |
| Unilateral                    | 23 (11)        | 1 (7)              | 5 (7)               | 7 (8)                | 2 (8)                | 4 (29)             |                                   |
| Type C                        |                |                    |                     |                      |                      |                    |                                   |
| Bilateral                     | 19 (9)         | 3 (21)             | 4 (6)               | 8 (9)                | 1(4)                 | 1 (7)              | 53 (12)                           |
| Unilateral                    | 15 (7)         | 0 (0)              | 4 (6)               | 3 (3)                | 1(4)                 | 2 (14)             |                                   |

EPIC-PCD: Ear-nose throat prospective international cohort of patients with primary ciliary dyskinesia. y: years.  
Tympanogram types by Jerger; types AD and AS are grouped under type. Findings are presented as N and column %; categories are not exclusive.

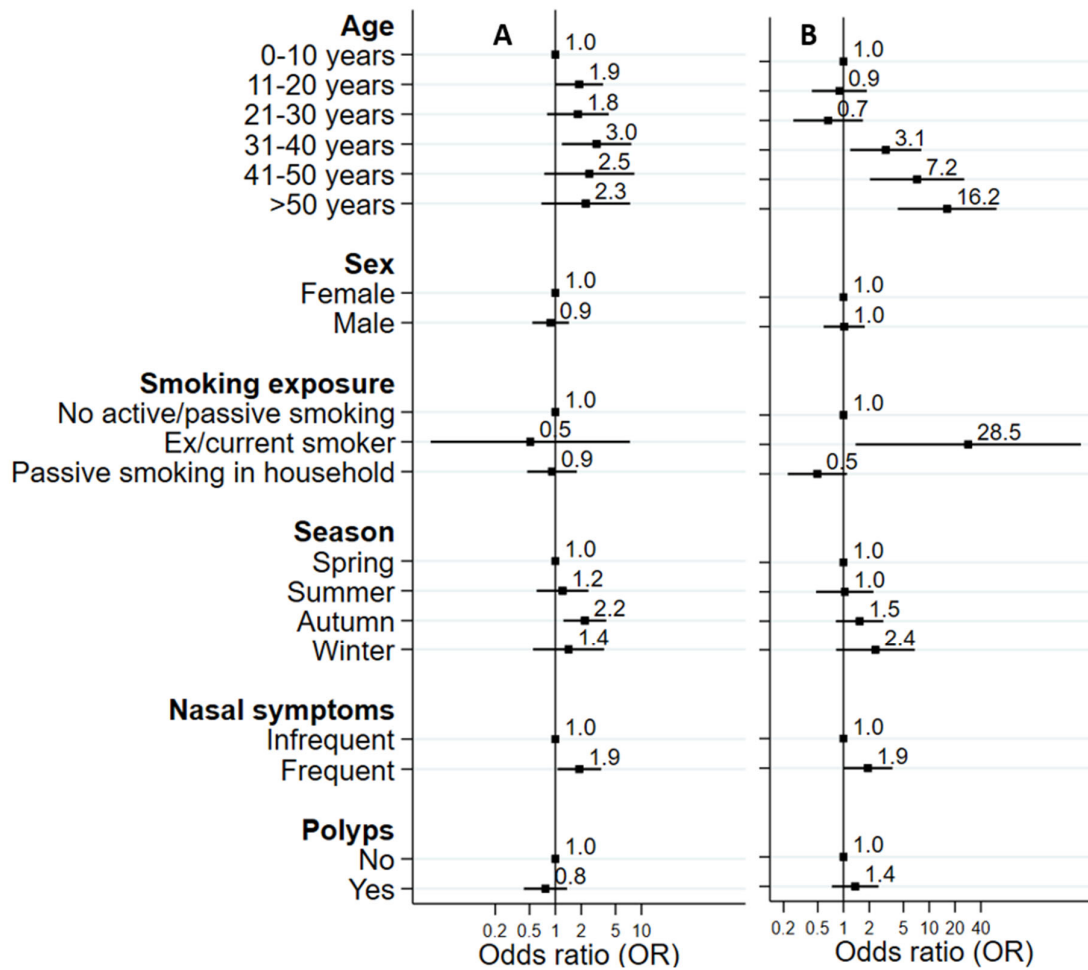

**eFigure 3.** Factors associated with the A) ear inflammation and B) hearing score among EPIC-PCD participants with definite PCD diagnosis

EPIC-PCD: Ear-nose throat prospective international cohort of patients with primary ciliary dyskinesia  
 Definite PCD defined as biallelic pathogenic mutation or hallmark defect identified by transmission electron microscopy

For the ear inflammation score, we included any reported ear pain or ear discharge, presence of tympanostomy tubes, otitis media and tympanic perforation during otoscopy, each of which scored as 0 (absence) or 1 (presence); total score ranged from 0 to 4. For the hearing score, we included reported hearing problems (0 to 4: never to daily) and audiometry results (0 to 4: normal to profound hearing impairment) with total score ranging from 0 to 8.

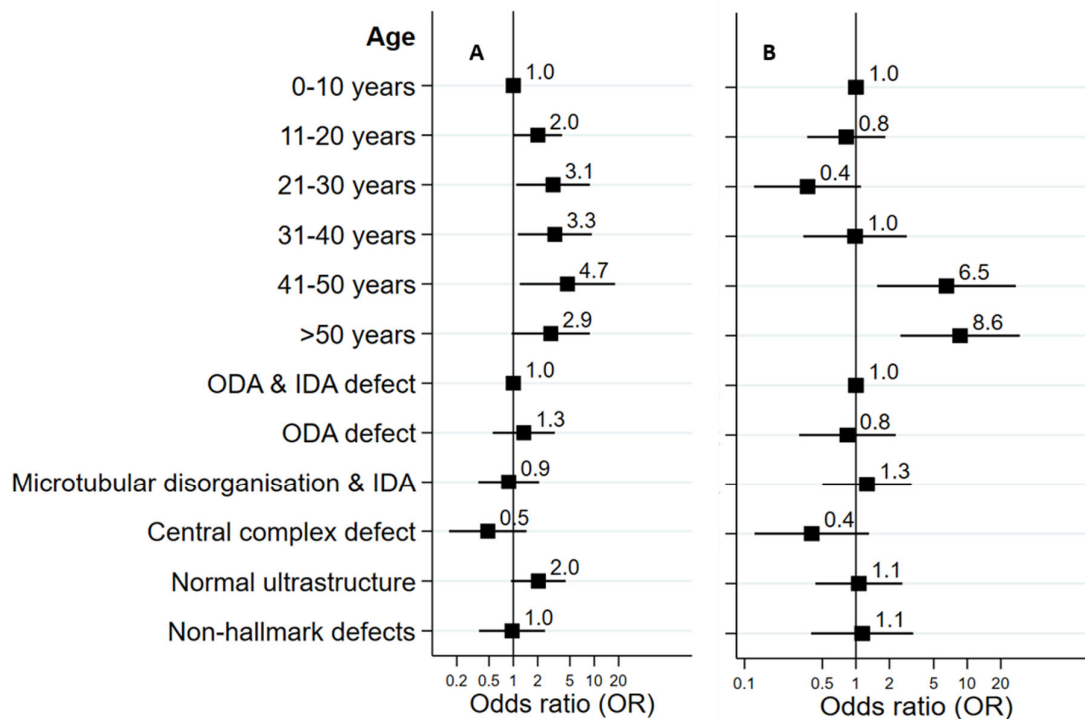

**eFigure 4.** Association of ciliary ultrastructural defect with the A) ear inflammation and B) hearing score among EPIC-PCD participants

EPIC-PCD: Ear-nose throat prospective international cohort of patients with primary ciliary dyskinesia  
 For the ear inflammation score, we included any reported ear pain or ear discharge, presence of tympanostomy tubes, otitis media and tympanic perforation during otoscopy, each of which scored as 0 (absence) or 1 (presence); total score ranged from 0 to 4. For the hearing score, we included reported hearing problems (0 to 4: never to daily) and audiometry results (0 to 4: normal to profound hearing impairment) with total score ranging from 0 to 8. Non-hallmark defects include all other class 2 ciliary ultrastructural defects besides central complex defect
