# Supplementary material
Source: PubMed Central journal article supplement (PMC10176184)
Supplement: jamaotolaryngolheadnecksurg-e230841-s002.pdf [file jamaotolaryngolheadnecksurg-e230841-s002.pdf]

## Data Sharing Statement

Goutaki. Characteristics of Otologic Disease Among Patients With Primary Ciliary Dyskinesia. *JAMA Otolaryngol Head Neck Surg*. Published May 11, 2023. doi:10.1001/jamaoto.2023.0841

### Data

**Data available:** No

### Additional Information

**Explanation for why data not available:** EPIC-PCD study data is not deposited at an open access repository. Because of the rarity of the disease although data is pseudonymised, it may include still sensitive information; therefore, participants were not asked to give consent to have their data deposited publicly. Partial datasets for specific analyses including individual patient data and a data dictionary defining each included field will be available from Dr M Goutaki ([myrofora.goutaki@ispm.unibe.ch](mailto:myrofora.goutaki@ispm.unibe.ch)) upon reasonable request.
